# Supplementary material for: Development of quantitative 13C NMR characterization and simulation of C, H, and O content for pyrolysis oils based on 13C NMR analysis
Source: Royal Society of Chemistry journal article supplement (doi:10.1039/d0ra02376k), 2020-01-01
Supplement: d0ra02376k1.pdf [file d0ra02376k1.pdf]

## **Supplementary Materials**

# **Development of Quantitative $^{13}\text{C}$ NMR Characterization and simulation of C, H, O contents for pyrolysis oils based on the $^{13}\text{C}$ NMR analysis**

**Rui Wang,<sup>12</sup> Ying Luo,<sup>12</sup> Hang Jia,<sup>12</sup> Jack R. Ferrell III<sup>3</sup>  
and Haoxi Ben<sup>\*12</sup>**

<sup>1</sup> Southeast University, Nanjing 210096, China

<sup>2</sup> Key Laboratory of Energy Thermal Conversion and Control of Ministry of  
Education, Nanjing 210096, China

<sup>3</sup>Catalytic Carbon Transformation & Scaleup Center, National Renewable Energy  
Laboratory, Golden, CO, USA.

\*Correspondence should be addressed to Pro. Haoxi Ben

Email: [benhaoxi@gmail.com](mailto:benhaoxi@gmail.com)

**Table S1.** Certified value for standard #1 (ASTM-P-0050)

| Analyte       | CAS Number | Target Concentration ( $w_t$ %) | Formula                         |
|---------------|------------|---------------------------------|---------------------------------|
| n-Pentane     | 109-66-0   | 6.66                            | C <sub>5</sub> H <sub>12</sub>  |
| n-Hexane      | 110-54-3   | 6.66                            | C <sub>6</sub> H <sub>14</sub>  |
| n-Heptane     | 142-82-5   | 6.66                            | C <sub>7</sub> H <sub>16</sub>  |
| n-Octane      | 111-65-9   | 6.66                            | C <sub>8</sub> H <sub>18</sub>  |
| n-Nonane      | 111-84-2   | 6.66                            | C <sub>9</sub> H <sub>20</sub>  |
| n-Decane      | 124-18-5   | 6.66                            | C <sub>10</sub> H <sub>22</sub> |
| n-Undecane    | 1120-21-4  | 6.66                            | C <sub>11</sub> H <sub>24</sub> |
| n-Dodecane    | 112-40-3   | 13.33                           | C <sub>12</sub> H <sub>26</sub> |
| n-Tetradecane | 629-59-4   | 6.66                            | C <sub>14</sub> H <sub>30</sub> |
| n-Pentadecane | 629-62-9   | 6.66                            | C <sub>15</sub> H <sub>32</sub> |
| n-Hexadecane  | 544-76-3   | 6.66                            | C <sub>16</sub> H <sub>34</sub> |
| n-Heptadecane | 629-78-7   | 6.66                            | C <sub>17</sub> H <sub>36</sub> |
| n-Octadecane  | 596-45-3   | 6.66                            | C <sub>18</sub> H <sub>38</sub> |
| n-Eicosane    | 112-95-8   | 6.66                            | C <sub>20</sub> H <sub>42</sub> |

**Table S2.** Certified value for standard #2 (D-5443-93-HTM)

| Analyte                    | CAS Number | Certified Value ( $w_t$ %) | Formula                          |
|----------------------------|------------|----------------------------|----------------------------------|
| Cyclopentane               | 287-92-3   | 1                          | c-C <sub>5</sub> H <sub>10</sub> |
| n-Pentane                  | 109-66-0   | 1                          | n-C <sub>5</sub> H <sub>12</sub> |
| Cyclohexane                | 110-82-7   | 2                          | c-C <sub>6</sub> H <sub>12</sub> |
| 2,3-Dimethylbutane         | 79-29-8    | 2                          | C <sub>6</sub> H <sub>14</sub>   |
| n-Hexane                   | 110-54-3   | 2                          | C <sub>6</sub> H <sub>14</sub>   |
| 1-Hexene                   | 592-41-6   | 1.5                        | C <sub>6</sub> H <sub>12</sub>   |
| Methylcyclohexane          | 108-87-2   | 4.25                       | C <sub>7</sub> H <sub>14</sub>   |
| 4-Methyl-1-hexene          | 3769-23-1  | 1.5                        | C <sub>7</sub> H <sub>14</sub>   |
| n-Heptane                  | 142-82-5   | 3.5                        | C <sub>7</sub> H <sub>16</sub>   |
| 1,2-Dimethylcyclohexane    | 583-57-3   | 5                          | C <sub>8</sub> H <sub>16</sub>   |
| Isooctane                  | 540-84-1   | 5                          | C <sub>8</sub> H <sub>18</sub>   |
| n-Octane                   | 111-65-9   | 5                          | C <sub>8</sub> H <sub>18</sub>   |
| 1,2,4-Trimethylcyclohexane | 2234-75-5  | 4.25                       | C <sub>9</sub> H <sub>18</sub>   |
| n-Nonane                   | 111-84-2   | 4.5                        | C <sub>9</sub> H <sub>20</sub>   |
| n-Decane                   | 124-18-5   | 4.25                       | C <sub>10</sub> H <sub>22</sub>  |
| n-Undecane                 | 1120-21-4  | 3.5                        | C <sub>11</sub> H <sub>24</sub>  |
| n-Dodecane                 | 112-40-3   | 3.25                       | C <sub>12</sub> H <sub>26</sub>  |
| Benzene                    | 71-43-2    | 3.25                       | C <sub>6</sub> H <sub>6</sub>    |
| Toluene                    | 108-88-3   | 2.25                       | C <sub>7</sub> H <sub>8</sub>    |
| trans-Decahydronaphthalene | 493-02-7   | 4.25                       | C <sub>10</sub> H <sub>18</sub>  |
| n-Tetradecane              | 629-59-4   | 4.5                        | C <sub>14</sub> H <sub>30</sub>  |
| Ethylbenzene               | 100-41-4   | 4.5                        | C <sub>8</sub> H <sub>10</sub>   |
| o-Xylene                   | 95-47-6    | 4.25                       | C <sub>8</sub> H <sub>10</sub>   |
| n-Propylbenzene            | 103-65-1   | 5                          | C <sub>9</sub> H <sub>12</sub>   |
| 1,2,4-Trimethylbenzene     | 95-63-6    | 4.5                        | C <sub>9</sub> H <sub>12</sub>   |
| 1,2,3-Trimethylbenzene     | 526-73-8   | 5                          | C <sub>9</sub> H <sub>12</sub>   |
| 1,2,4,5-Tetramethylbenzene | 95-93-2    | 5                          | C <sub>10</sub> H <sub>14</sub>  |
| Pentamethylbenzene         | 700-12-9   | 5                          | C <sub>11</sub> H <sub>16</sub>  |

**Table S3.** The feed types of industrial fluid catalytic cracking units

| Feed | Sample | Composition                                              |
|------|--------|----------------------------------------------------------|
| 1    | KO105  | kerosene + oak wood (1) pyrolysis oil (5 $w_t$ %)        |
| 2    | VO105  | vacuum gas oil + oak wood (1) pyrolysis oil (5 $w_t$ %)  |
| 3    | KO110  | kerosene + oak wood (1) pyrolysis oil (10 $w_t$ %)       |
| 4    | VO110  | vacuum gas oil + oak wood (1) pyrolysis oil (10 $w_t$ %) |
| 5    | KO205  | kerosene + oak wood (2) pyrolysis oil (5 $w_t$ %)        |
| 6    | VO205  | vacuum gas oil + oak wood (2) pyrolysis oil (5 $w_t$ %)  |
| 7    | KO210  | kerosene + oak wood (2) pyrolysis oil (10 $w_t$ %)       |
| 8    | VO210  | vacuum gas oil + oak wood (2) pyrolysis oil (10 $w_t$ %) |

**Table S4.**  $^{13}\text{C}$  NMR chemical shift assignment ranges for pyrolysis oils (on the basis of reference<sup>30</sup>).

| Type of carbons    | Range (ppm)                                               | Structure |
|--------------------|-----------------------------------------------------------|-----------|
| Carbonyl           | 215.0-166.5                                               |           |
| Aromatic C-O       | 166.5-142.0                                               |           |
| Aromatic C-C       | 142.0-125.0                                               |           |
| Aromatic C-H       | 125.0-95.8                                                |           |
| Levoglucosan       | C1 102.3, C2 72.0<br>C3 73.7, C4 71.7<br>C5 76.5, C6 64.9 |           |
| Aliphatic C-O      | 95.8-60.8                                                 |           |
| Methoxyl           | 60.8-55.2                                                 |           |
| Aliphatic C-C      | 55.2-0.0                                                  |           |
| Methyl – Aromatic  | 21.6-19.1                                                 |           |
| Methyl – Aromatic' | 16.1-15.4                                                 |           |

**Table S5.** The influences for concentrations of relax reagent on the  $T_1$  of bio-oils.

| C=O             | Aromatic carbons | Aliphatic C-O   | Aliphatic C-C  |
|-----------------|------------------|-----------------|----------------|
| 230 - 166.5 ppm | 166.5 - 95.8 ppm | 95.8 - 53.5 ppm | 53.3 - 0.0 ppm |

|                               |           |            |            |           |
|-------------------------------|-----------|------------|------------|-----------|
| 5 mg/ml Cr(acac) <sub>3</sub> | 459.268ms | 211.380ms  | 277.742ms  | 269.905ms |
| 1 mg/ml Cr(acac) <sub>3</sub> | 893.397ms | 1244.000ms | 2246.000ms | 785.890ms |

**Table S6.** In-situ aging test for quantitative <sup>13</sup>C NMR for bio-oil sample produced from oak wood with 5mg/ml relax reagent, the results shown as carbon *mol%*.

| Functional groups | Integration |       |       |       |       |       |
|-------------------|-------------|-------|-------|-------|-------|-------|
|                   | 8 hs        | 16 hs | 24 hs | 32 hs | 40 hs | 48 hs |

|                                                                                     |      |      |      |      |      |      |
|-------------------------------------------------------------------------------------|------|------|------|------|------|------|
|    | 16.4 | 16.4 | 15.6 | 16.8 | 16.7 | 16.1 |
|    | 7.5  | 7.4  | 7.2  | 7.2  | 7.5  | 6.2  |
|    | 1.8  | 1.2  | 2.3  | 2.0  | 1.7  | 3.1  |
|    | 12.0 | 11.7 | 12.1 | 12.3 | 11.6 | 13.3 |
|    | 43.0 | 44.7 | 43.9 | 42.3 | 42.5 | 42.1 |
|    | 31.4 | 30.6 | 29.5 | 30.4 | 31.4 | 30.7 |
|    | 3.1  | 3.2  | 3.3  | 3.1  | 3.2  | 3.2  |
|    | 16.3 | 15.4 | 15.6 | 16.3 | 16.7 | 16.1 |
|   | 7.5  | 7.0  | 6.7  | 7.2  | 7.4  | 7.3  |
|  | 1.0  | 1.0  | 0.9  | 0.9  | 0.9  | 0.9  |

**Table S7.** In-situ aging test for quantitative  $^{13}\text{C}$  NMR for bio-oil sample produced from cottonwood with 5mg/ml relax reagent, the results shown as carbon *mol*%.

| Functional groups | Integration |       |       |       |       |
|-------------------|-------------|-------|-------|-------|-------|
|                   | 0 hs        | 12 hs | 24 hs | 36 hs | 48 hs |

|                                                                                     |      |      |      |      |      |
|-------------------------------------------------------------------------------------|------|------|------|------|------|
|    | 9.6  | 7.2  | 6.5  | 3.6  | 4.2  |
|    | 7.4  | 8.5  | 7.8  | 7.4  | 8.6  |
|    | 3.6  | 6.0  | 6.0  | 4.6  | 6.7  |
|    | 9.9  | 12.1 | 15.0 | 13.0 | 15.2 |
|    | 1.4  | 1.6  | 1.7  | 1.9  | 1.6  |
|    | 25.2 | 24.6 | 24.2 | 26.5 | 24.5 |
|    | 8.7  | 8.6  | 8.5  | 8.7  | 8.4  |
|   | 34   | 33.1 | 32.1 | 34.0 | 31.8 |
|  | 4.4  | 4.2  | 4.1  | 4.5  | 4.0  |
|  | 4.7  | 4.7  | 4.5  | 5.1  | 4.5  |

**Table S8.** In-situ aging test for quantitative  $^{13}\text{C}$  NMR for bio-oil sample produced from the mixture of cottonwood and coal with 5mg/ml relax reagent, the results shown as carbon *mol%*.

| Functional | Integration |
|------------|-------------|
|------------|-------------|



| groups                                                                              | 0 hs | 12 hs | 24 hs | 36 hs | 48 hs |
|-------------------------------------------------------------------------------------|------|-------|-------|-------|-------|
|    | 3.9  | 2.2   | 4.4   | 3.6   | 7.1   |
|    | 2.6  | 2.5   | 4.6   | 5.8   | 3.3   |
|    | 16.3 | 16.2  | 16.6  | 17    | 15.8  |
|    | 15.1 | 15.1  | 15.8  | 16    | 12.6  |
|    | 1.8  | 1.4   | 1.5   | 1.9   | 1.3   |
|    | 20.6 | 18.8  | 18.3  | 18.6  | 16.5  |
|   | 8.1  | 7.4   | 7.6   | 7.3   | 5.6   |
|  | 34.1 | 36.6  | 33.8  | 32.1  | 36.7  |
|  | 5.3  | 5.7   | 5.2   | 4.8   | 3.7   |
|  | 2.3  | 2.1   | 2.2   | 2.1   | 2.1   |

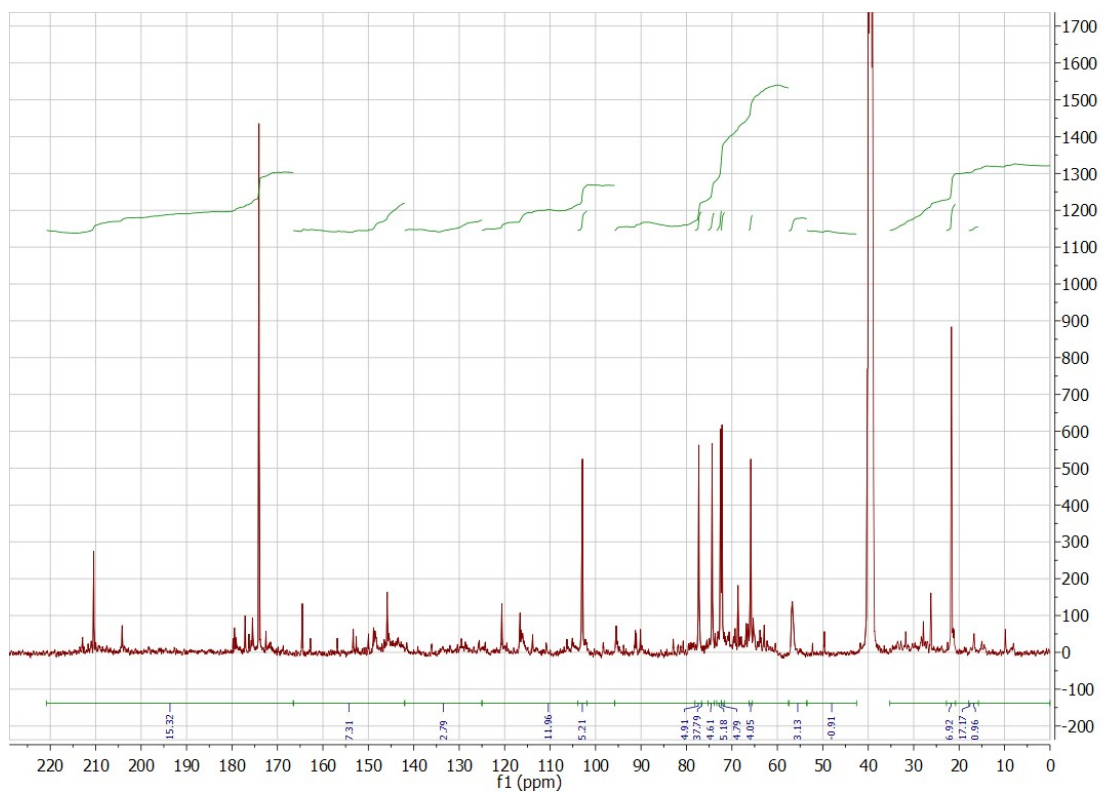

**Figure S1.** Quantitative  $^{13}\text{C}$  NMR for pyrolysis oil sample without relax reagent, pulse delay was set as 60 s.

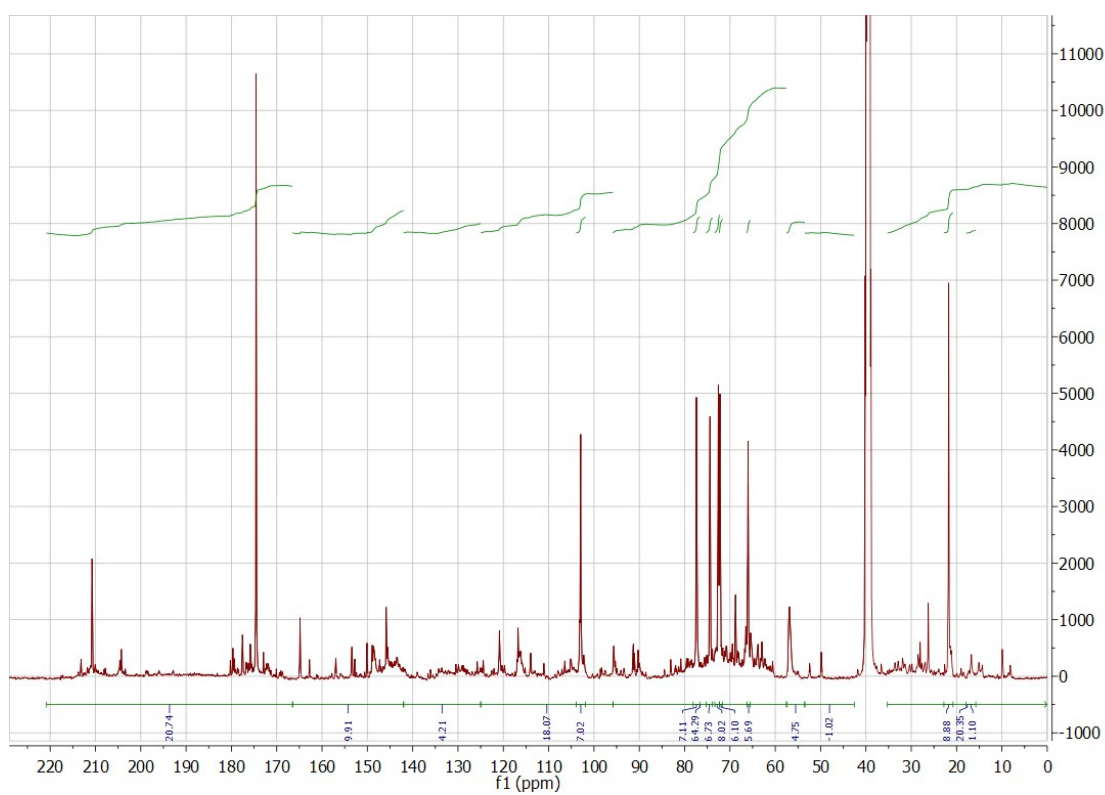

**Figure S2.** Quantitative  $^{13}\text{C}$  NMR for pyrolysis oil sample with 1 mg/ml relax reagent, pulse delay was set as 15 s.

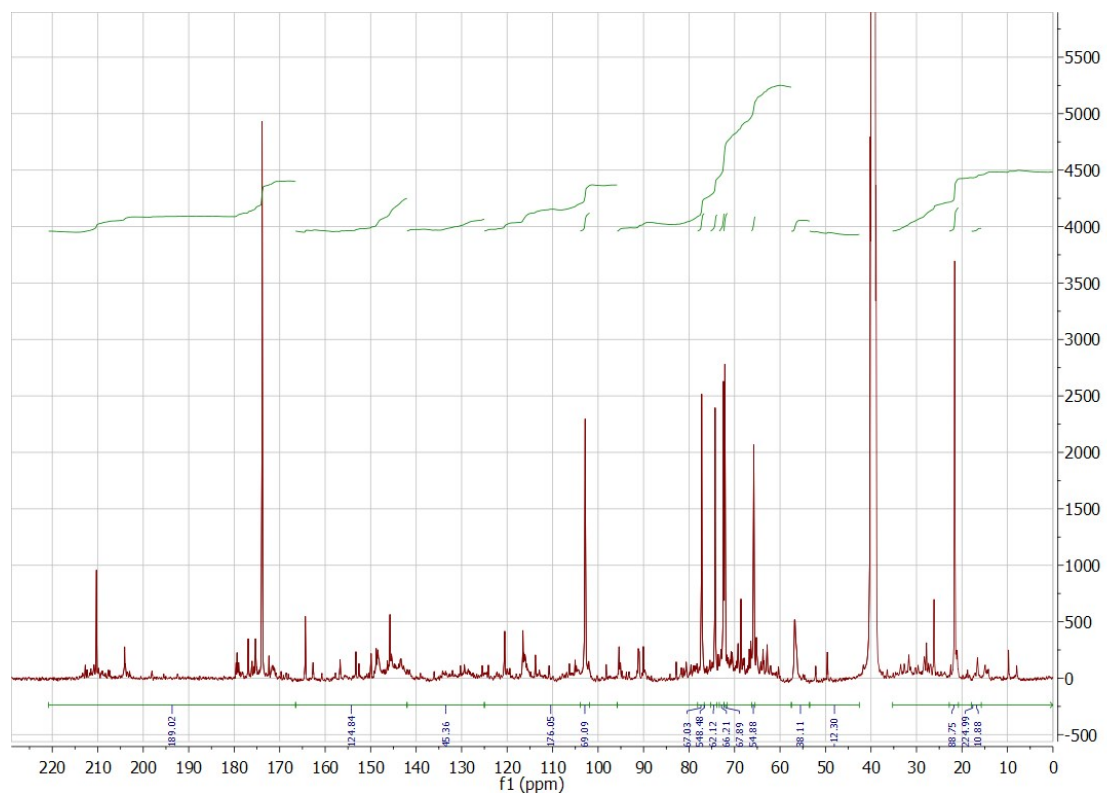

**Figure S3.** Quantitative  $^{13}\text{C}$  NMR for pyrolysis oil sample with 5 mg/ml relax reagent, pulse delay was set as 15 s.

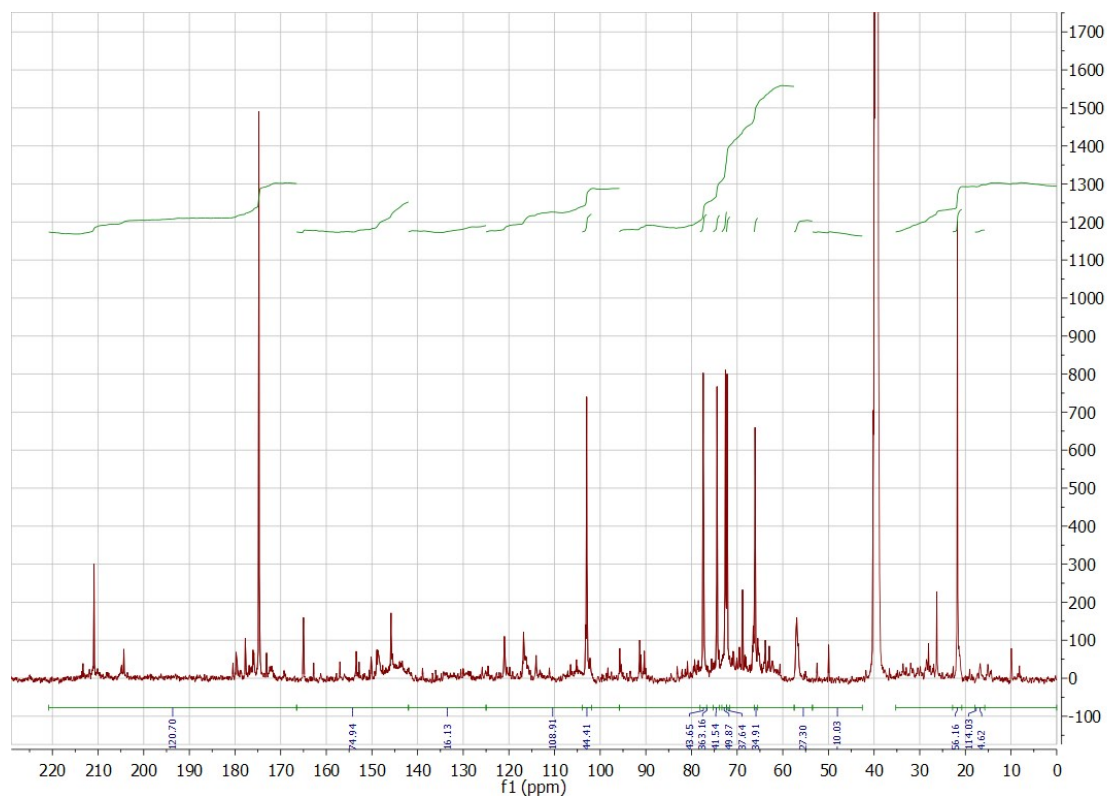

**Figure S4.** Quantitative  $^{13}\text{C}$  NMR for pyrolysis oil sample with 5 mg/ml relax reagent, pulse delay was set as 3 s.

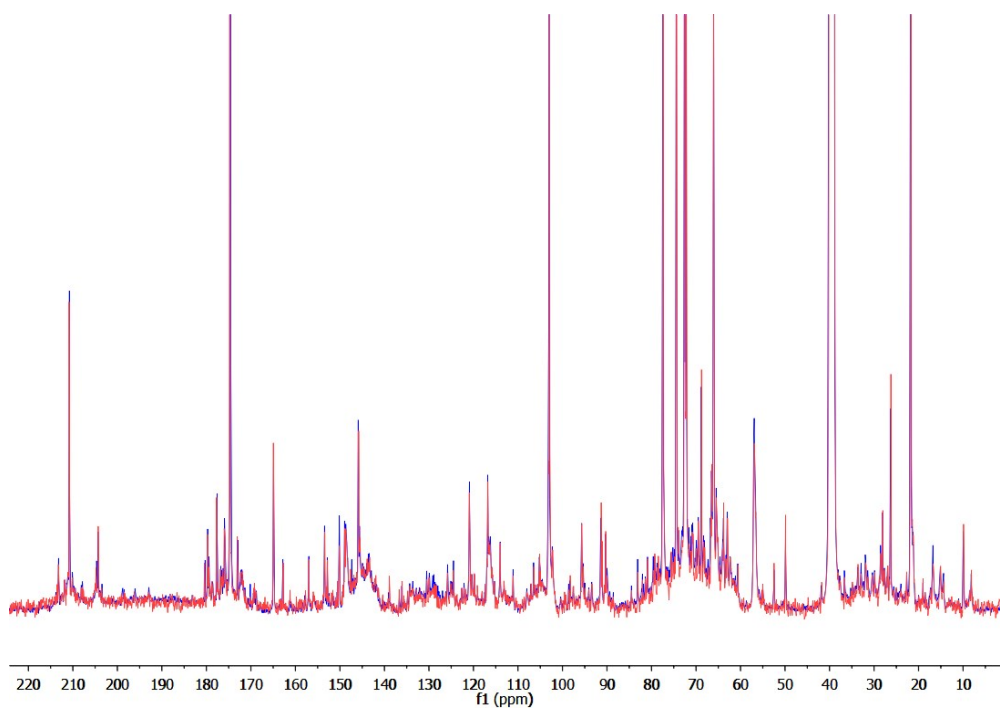

**Figure S5.** Quantitative <sup>13</sup>C NMR for bio-oil samples produced from oak wood with 5 mg/ml relax reagent, pulse delay was set as 3 s with 8 k scans (blue) and 1 k scans (red).

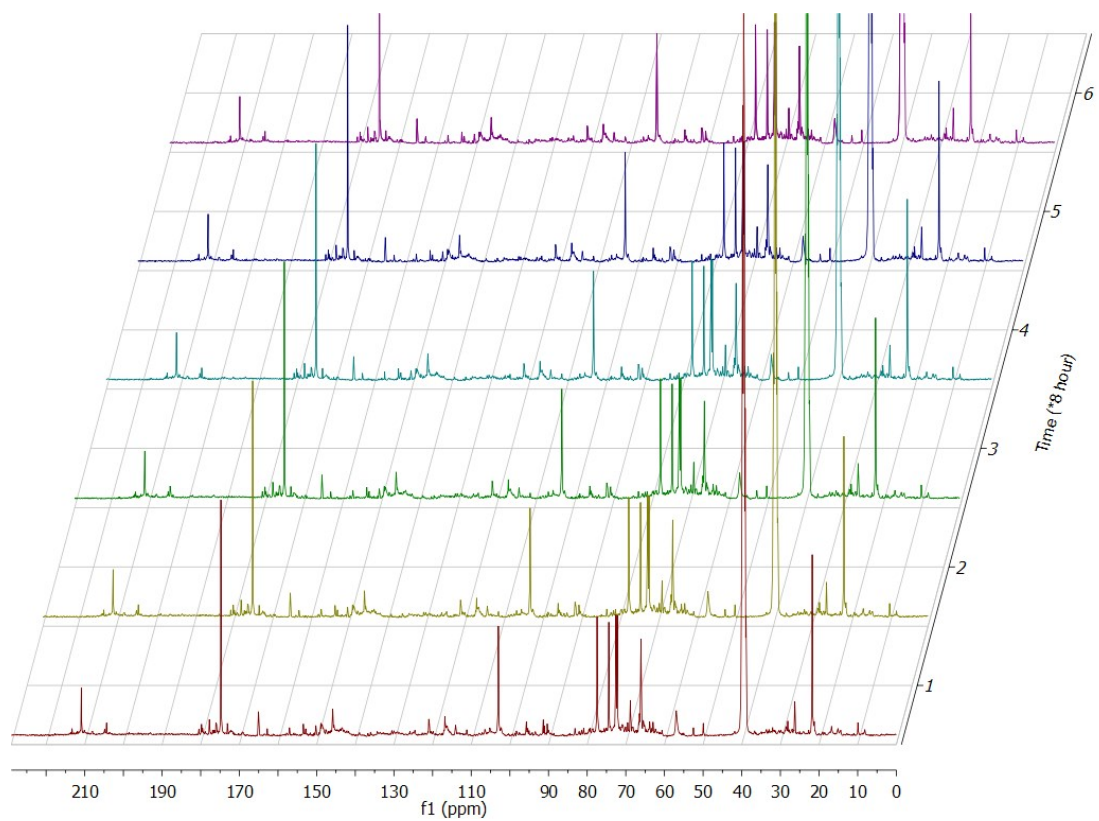

**Figure S6.** In-situ aging test for quantitative <sup>13</sup>C NMR for bio-oil sample produced from oak wood with 5 mg/ml relax reagent.

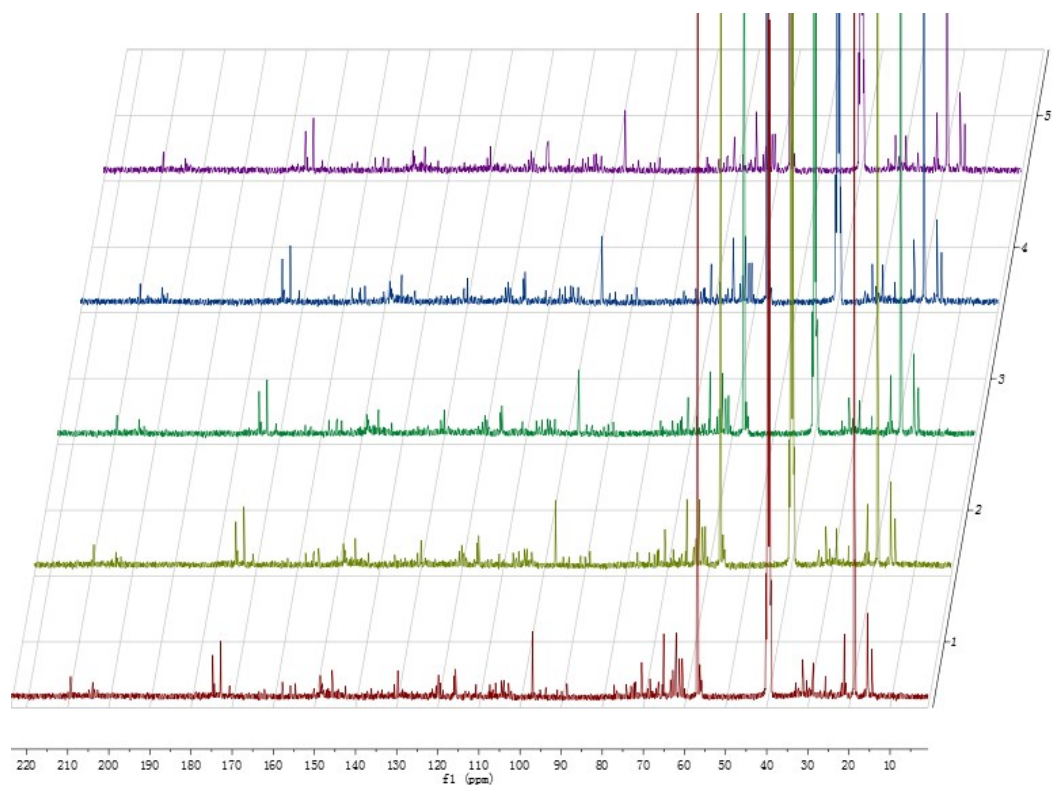

**Figure S7.** In-situ aging test for quantitative  $^{13}\text{C}$  NMR for bio-oil sample produced from cottonwood with 5 mg/ml relax reagent.

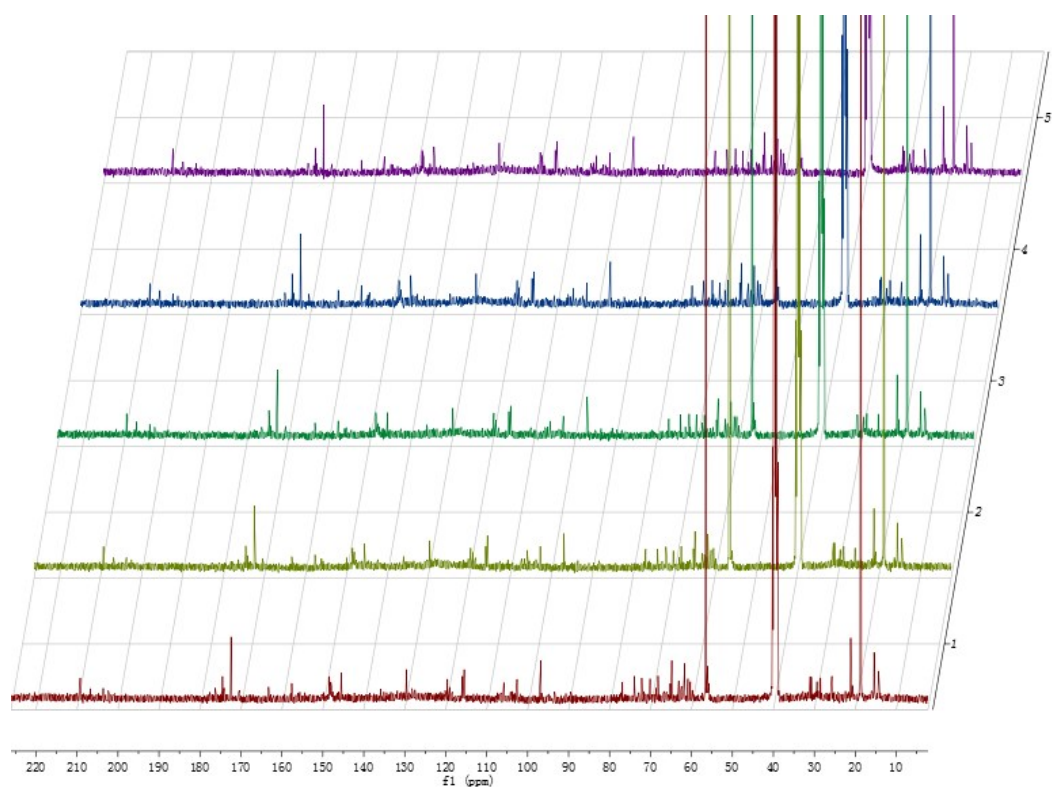

**Figure S8.** In-situ aging test for quantitative  $^{13}\text{C}$  NMR for bio-oil sample produced from the mixture of cottonwood and coal with 5 mg/ml relax reagent.

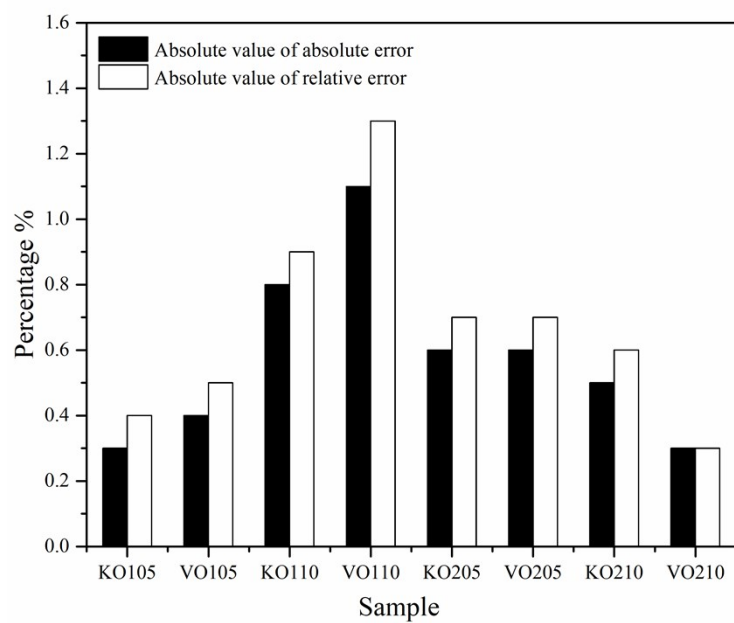

(a)

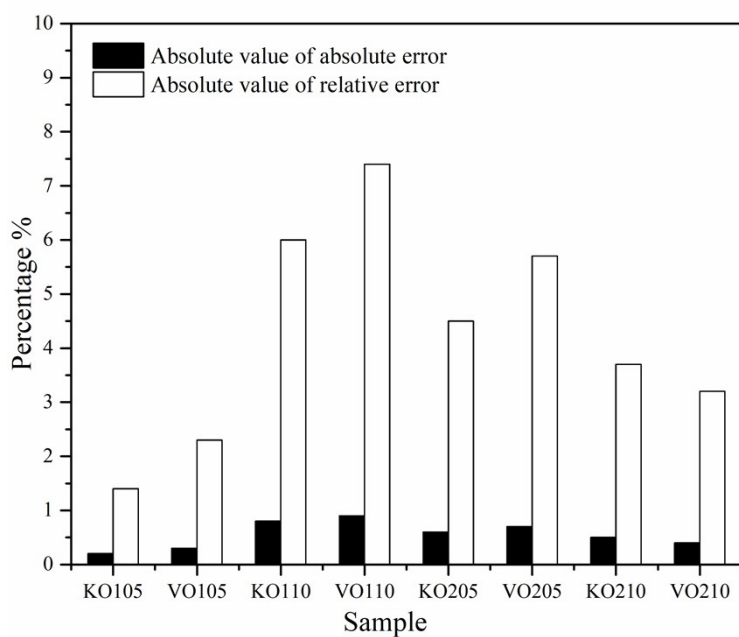

(b)

**Figure S9.** The absolute value of absolute error and relative error for oxygen-deficient compounds: (a) Carbon; (b) Hydrogen.

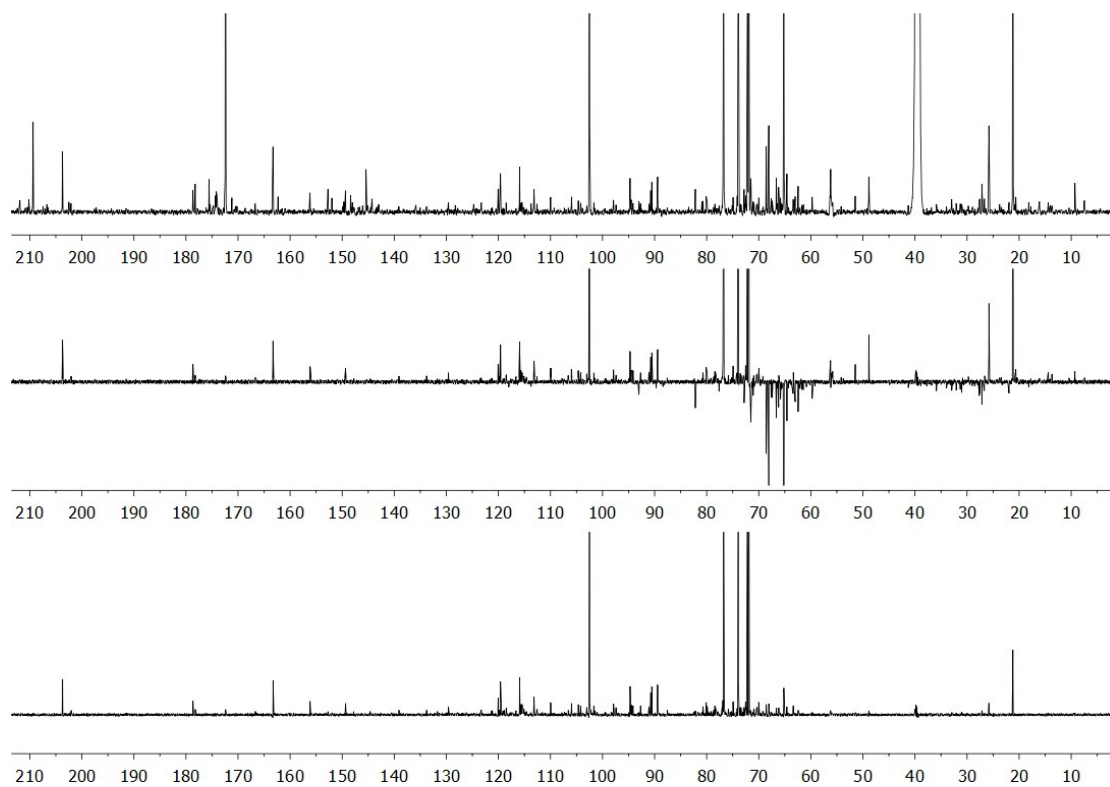

**Figure S10.** Quantitative  $^{13}\text{C}$  NMR and DEPT 135 and DEPT 90 (from top to bottom) for the pyrolysis oil of oak wood 1.

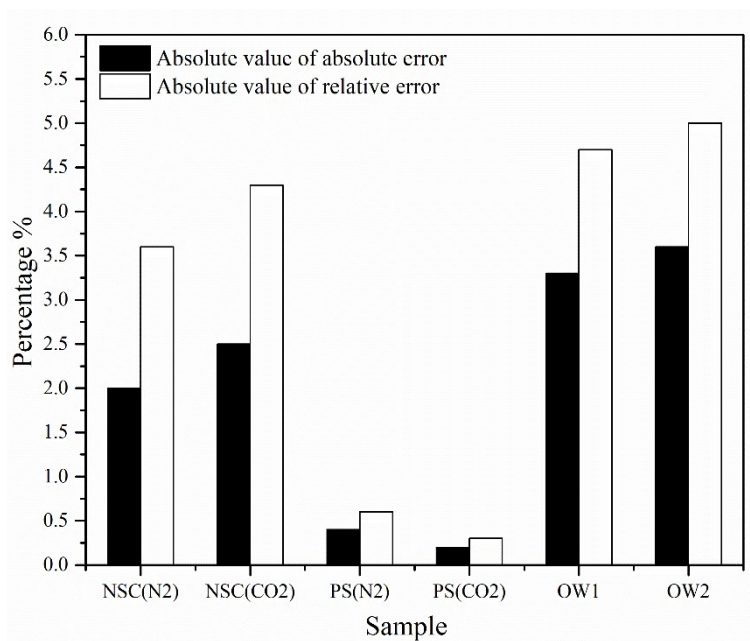

(a)



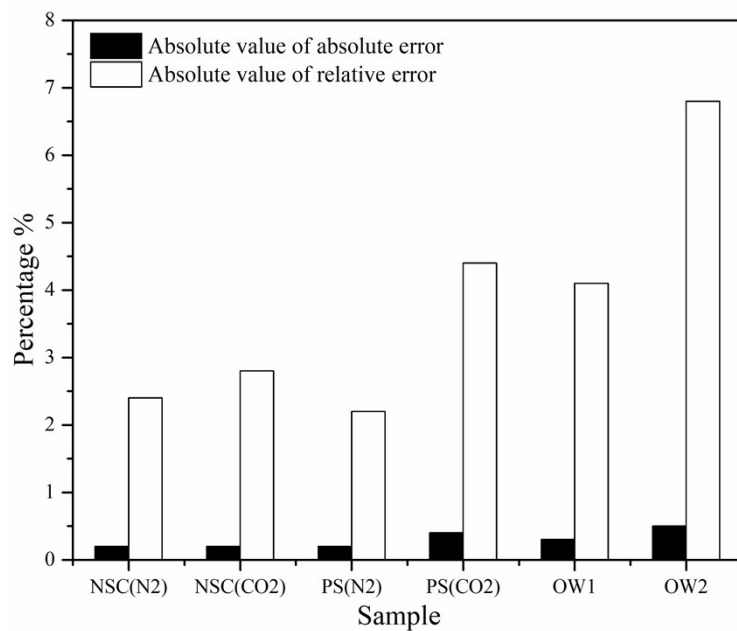

(b)

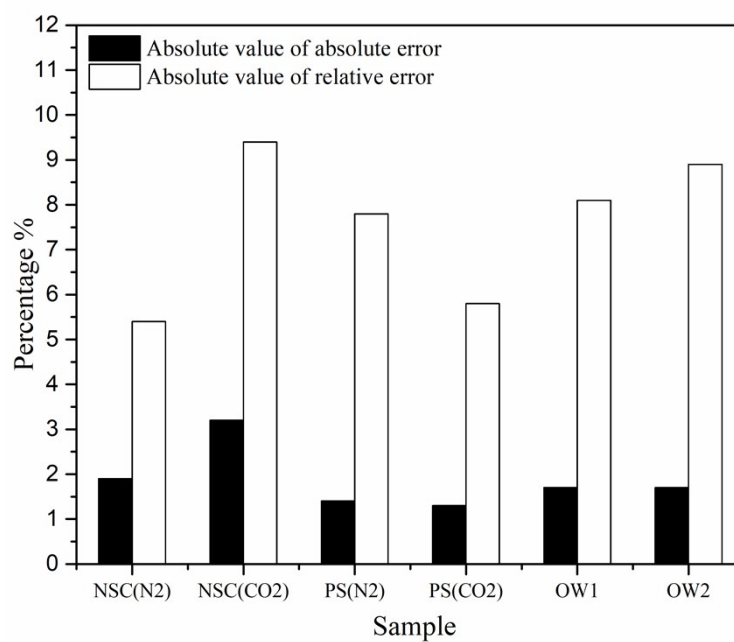

(c)

**Figure S11.** The absolute value of absolute error and relative error for oxygen-rich pyrolysis oils: (a) Carbon; (b) Hydrogen; (c) Oxygen.

## References

- (30) Ben, H.; Ragauskas, A. J. NMR Characterization of Pyrolysis Oils from Kraft Lignin. *Energy Fuels* **2011**, 25 (5), 2322–2332.  
[doi:10.1021/ef2001162](https://doi.org/10.1021/ef2001162).
